# Supplementary material for: Manganese(ii) enhanced fluorescent nitrogen-doped graphene quantum dots: a facile and efficient synthesis and their applications for bioimaging and detection of Hg2+ ions
Source: Royal Society of Chemistry journal article supplement (doi:10.1039/c7ra12133d), 2018-01-01
Supplement: c7ra12133d1.pdf [file c7ra12133d1.pdf]

## Supporting Information

### **Manganese(II) enhanced fluorescent nitrogen-doped graphene quantum dots: a facile and efficient synthesis and their applications for bioimaging and detection of Hg<sup>2+</sup> ions**

<sup>1</sup>Li Yang, <sup>1</sup>Aimiao Qin\*, <sup>1</sup>Shuoping Chen, <sup>1</sup>Lei Liao, <sup>2</sup>Jiangke Qin,  
<sup>1</sup>Kaiyou Zhang

<sup>1</sup>Key Lab New Processing Technology for Nonferrous Metals & Materials Ministry of  
Education, Guangxi Key Laboratory in Universities of Clean Metallurgy and  
Comprehensive Utilization for Non-ferrous Metals Resources, College of Materials  
Science & Engineering, Guilin University of Technology, Guilin, China

<sup>2</sup>College of Chemistry and Pharmaceutical Science, Guangxi Normal university,  
Guilin, China

This supporting information includes:

Quantum yield measurements, the concentrations of Mn(II)-NGQDs solution test,  
Cellular toxicity test, Fluorescence life time, Table S1, Table S2, Table S3, Fig. S1,  
Fig. S2, Fig. S3(a)-(b), Fig. S4, Fig. S5(a)-(d), Fig. S6(a)-(f), Fig.S7(a)-(f), Fig. S8,  
Fig. S9.

## Quantum yield measurements

The quantum yield (QY) of the Mn(II)-NGQDs, NG and M-NG were determined according to an established procedure using quinine sulfate (with QY of 54%, 0.1 M H<sub>2</sub>SO<sub>4</sub> as a solvent) as a reference. In order to minimize the reabsorption effects, absorbencies in the 10 mm fluorescence cuvette were kept between 0.02 to 0.05 at the excitation wavelength (360 nm) [S1]. The QY of the QDs was calculated according to the below equation:

$$\varphi_x = \varphi_{re} \times (I_x/I_{re}) \times (A_{re}/A_x) \times (n_x/n_{re})^2$$

Where  $\varphi$  is the QY,  $I$  is the measured integrated emission intensity,  $A$  is the absorbance and  $n$  is the refractive index of the solvent. The subscript “x” refers to the sample and “re” refers to the reference with known QY. For these solutions,  $n_x = n_{re} = 1.33$ .

## The concentrations of Mn(II)-NGQDs solution test

The calculation method of the concentrations of Mn(II)-NGQDs solution was described as follow: After the hydrothermal reaction finished, the obtained bright transparent solution was centrifuged at 10000 rpm/min for 10 min to remove the deposit. Subsequently, the supernatant of Mn(II)-NGQDs solution ( $V$  mL ) was added to glass bottle. Afterwards, the pure solid-state Mn(II)-NGQDs white powder was obtained by vacuum freeze drying, and the quality was recorded (named  $M$ ). Besides, the quality of empty bottle was also recorded (named  $M_0$ ). Finally, the calculated concentration of Mn(II)-NGQDs solution was 6.52 mg/mL, and this concentration value was used as a standard for further application of Hg<sup>2+</sup> ions detection, MTT test

and cell fluorescence imaging.

$$\text{Concentrations of Mn(II)-NGQDs (mg/mL)} = (M - M_0)/V$$

### **Cellular toxicity test**

The cytotoxicity of Mn(II)-NGQDs was evaluated by using the MTT assay<sup>[S2]</sup>. HepG2 human liver cancer cells were harvested (the cell density was adjusted to  $10^5$  cells per mL) and seeded in a 96-well plate overnight for 24 h. Then, the Mn(II)-NGQDs solution was added into each well with increasing concentrations from 0 to 300  $\mu\text{g/mL}$ . After that, the cells were cultivated for 4 and 24 h, respectively. And then, 10  $\mu\text{L}$  of 5 mg/mL MTT (3 - (4,5 -dimethylthiazol -2-yl) -2,5 -diphenyltetra -zolium bromide) solution were added to each cell well. After incubation for 4 h, the culture medium was discarded, and 100  $\mu\text{L}$  of dimethyl sulfoxide (DMSO) was added. The obtained mixture was shaken for 15 min in the dark at room temperature, and the absorbance of each well was measured at wavelength of 570 nm using an enzyme linked immunosorbent assay (Tecan Infinite M1000) reader with pure DMSO as a blank. In addition, HepG2 human liver cancer cells without Mn(II)-NGQDs treating were used as a control to test their relative cell viability. The cell viability was calculated according to the following equation:

$$\text{Cell viability (\%)} = \left( \frac{OD_{treated}}{OD_{control}} \right) \times 100\%$$

(where  $OD_{treated}$  was obtained in the presence of Mn(II)-NGQDs, and  $OD_{control}$  was obtained in the absence of Mn(II)-NGQDs.)

### Fluorescence life time test

Fluorescence life time was determined using time correlated single photon counting technique<sup>[S3]</sup>. The emission decay curves of Mn(II)-NGQDs and NG in different solutions are shown in Fig.S8. Decays were recorded for Mn(II)-NGQDs and NG with emission and excitation wavelengths at 440 nm and 369.6 nm respectively.

Decay curves were fitted using multi exponential model as the following Eq1:

$$R(t)=B_1e^{(-t/\tau_1)}+ B_2e^{(-t/\tau_2)}+ B_3e^{(-t/\tau_3)} \quad (1)$$

where  $R(t)$  is the intensity usually as summed to decay as the sum of individual single exponential decays,  $B_1$ ,  $B_2$  and  $B_3$  are the pre-exponential factors,  $\tau_1$ ,  $\tau_2$  and  $\tau_3$  are the decay times. The average life time ( $\tau_{ave}$ ) of Mn(II)-NGQDs in the presence of different concentration of  $Hg^{2+}$  in HMTA (pH=7.35) solution was determined by Eq2.

$$\tau_{ave} = \Sigma_i B_i \tau_i^2 / \Sigma_i B_i \tau_i \quad (2)$$

Table S1 The peaks table of Mn(II)-NGQDs and NG.

| Elements<br>Sample | C1s<br>atomic% | N1s<br>atomic% | O1s<br>atomic% | Mn2p<br>atomic% |
|--------------------|----------------|----------------|----------------|-----------------|
| NG                 | 60.48          | 2.2            | 37.33          | 0               |
| Mn(II)-NGQDs       | 55.43          | 4.24           | 40.11          | 0.21            |

Table S2 Comparison of different fluorescent probs for Hg<sup>2+</sup> detection.

| Fluorescence probe                          | QY (%) | LOD ( mol/L)           | Linear range (mol/L)                    | Ref.      |
|---------------------------------------------|--------|------------------------|-----------------------------------------|-----------|
| Valine-functionalized GQDs                  | 28.07  | $0.4 \times 10^{-8}$   | $0.8 \times 10^{-8} - 1 \times 10^{-6}$ | 46        |
| WS <sub>2</sub> nanosheet                   | —      | $3.3 \times 10^{-8}$   | $6 \times 10^{-8} - 4.5 \times 10^{-6}$ | 47        |
| Nitrogen-rich quantum dots(N-dots)          | 7.6    | $0.63 \times 10^{-6}$  | $0 - 20 \times 10^{-6}$                 | 48        |
| Nitrogen-doped carbon quantum dots (N-CQDs) | 15.7   | $0.23 \times 10^{-6}$  | $0 - 3 \times 10^{-5}$                  | 49        |
| Carbon dots                                 | 82.40  | $0.234 \times 10^{-6}$ | $0 - 2.5 \times 10^{-5}$                | 50        |
| Mn(II)-NGQDs                                | 42.16  | $3.4 \times 10^{-8}$   | $0 - 3.5 \times 10^{-6}$                | This work |

Table S3 Fluorescence decay time ( $\tau_{ave}$ ) and pre-exponential factor (B) of Mn(II)-NGQDs and NG

| sample                                                         | $\tau_1$ (ns) | $\tau_2$ (ns) | $\tau_3$ (ns) | $B_1$    | $B_2$       | $B_3$   | $\chi^2$ | $\tau_{ave}$ (ns) |
|----------------------------------------------------------------|---------------|---------------|---------------|----------|-------------|---------|----------|-------------------|
| NG                                                             | 1.25          | 5.45          | 11.96         | 4359.10  | 3384.9<br>3 | 2866.47 | 1.046    | 8.88              |
| Mn(II)-NGQDs                                                   | 7.58          | —             | —             | 10297.64 | —           | —       | 1.084    | 7.58              |
| Mn(II)-NGQDs+HMTA                                              | 7.50          | —             | —             | 10161.58 | —           | —       | 1.274    | 7.50              |
| Mn(II)-NGQDs+HMTA<br>+ $2.0 \times 10^{-6}$ mol/L<br>$Hg^{2+}$ | 7.44          | —             | —             | 9897.96  | —           | —       | 1.244    | 7.44              |
| Mn(II)-NGQDs+HMTA<br>+ $4.0 \times 10^{-6}$ mol/L<br>$Hg^{2+}$ | 7.41          | —             | —             | 10492.08 | —           | —       | 1.217    | 7.41              |

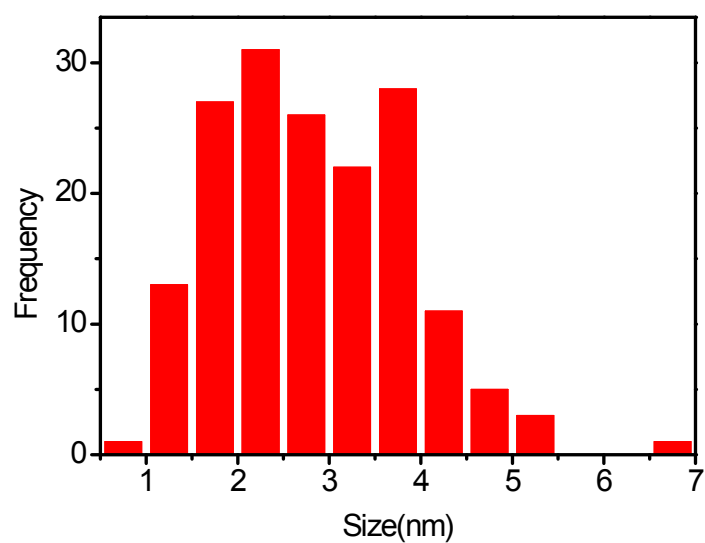

Fig. S1 Size distribution of the as-synthesized Mn(II)-NGQDs

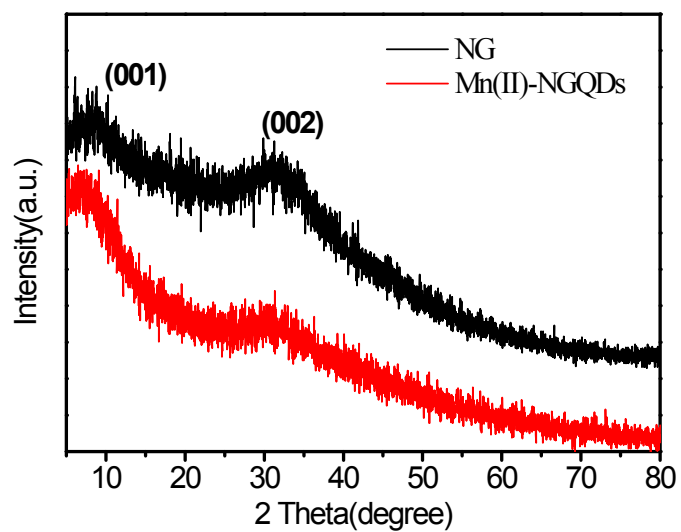

Fig. S2 XRD patterns of the Mn(II)-NGQDs and NG.

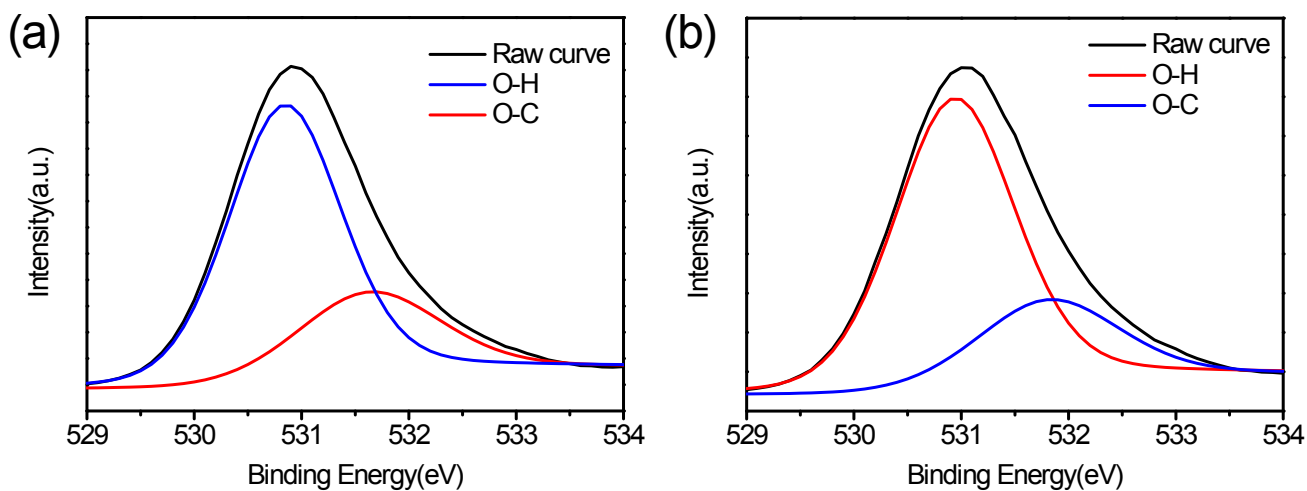

Fig. S3 The O1s spectra of Mn(II)-NGQDs (a) and NG (b).

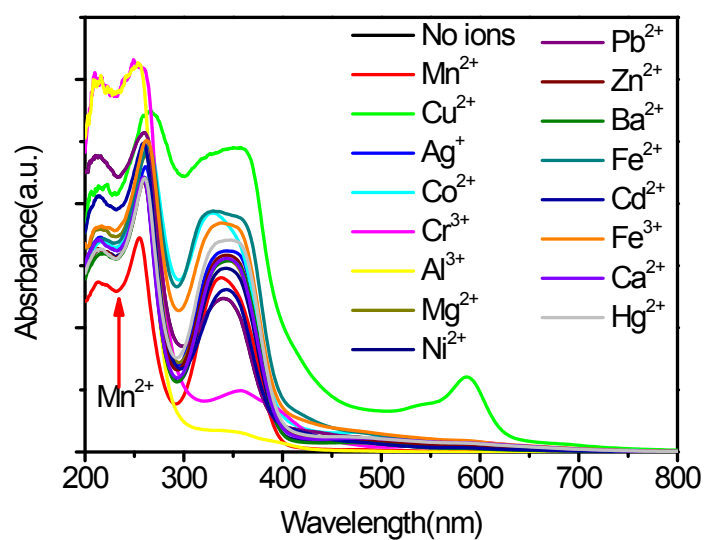

Fig. S4 The UV-vis absorption spectra of Mn(II)-NGQDs, M-NG and NG.



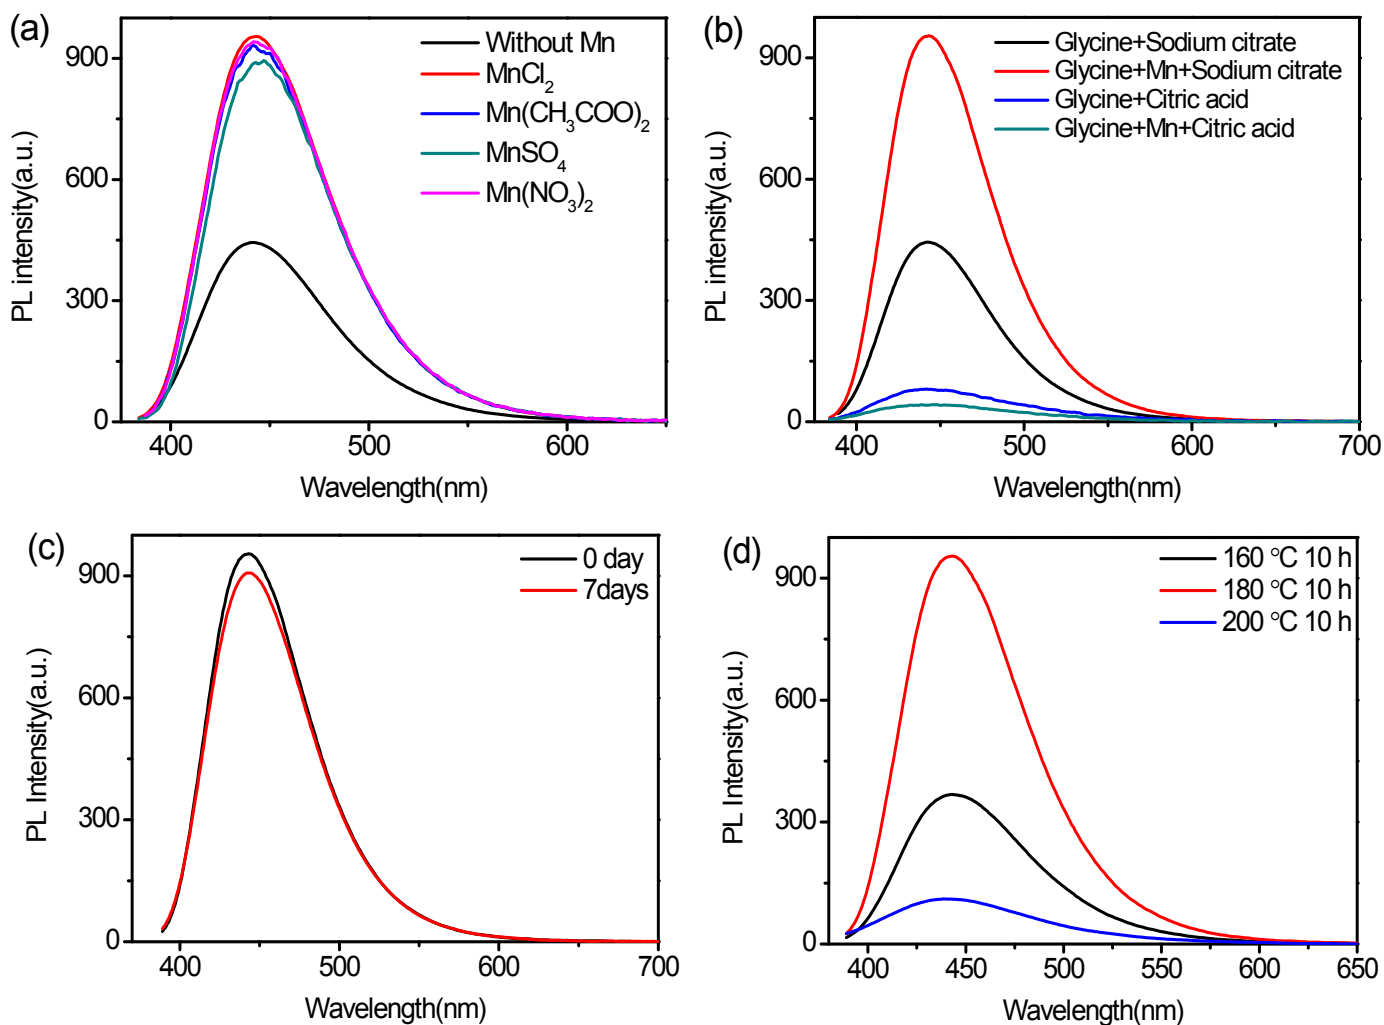

Fig. S5 (a) The PL spectra of Mn(II)-NGQDs prepared at different manganese(II) source with the 370 nm excitation wavelength; (b) The PL spectra of Mn(II)-NGQDs and NG prepared at different precursor; (c) The PL spectra of Mn(II)-NGQDs kept for 0 and 7 days at ambient temperature; (d) The emission spectra of Mn(II)-NGQDs prepared at different temperatures with the 370 nm excitation wavelength.



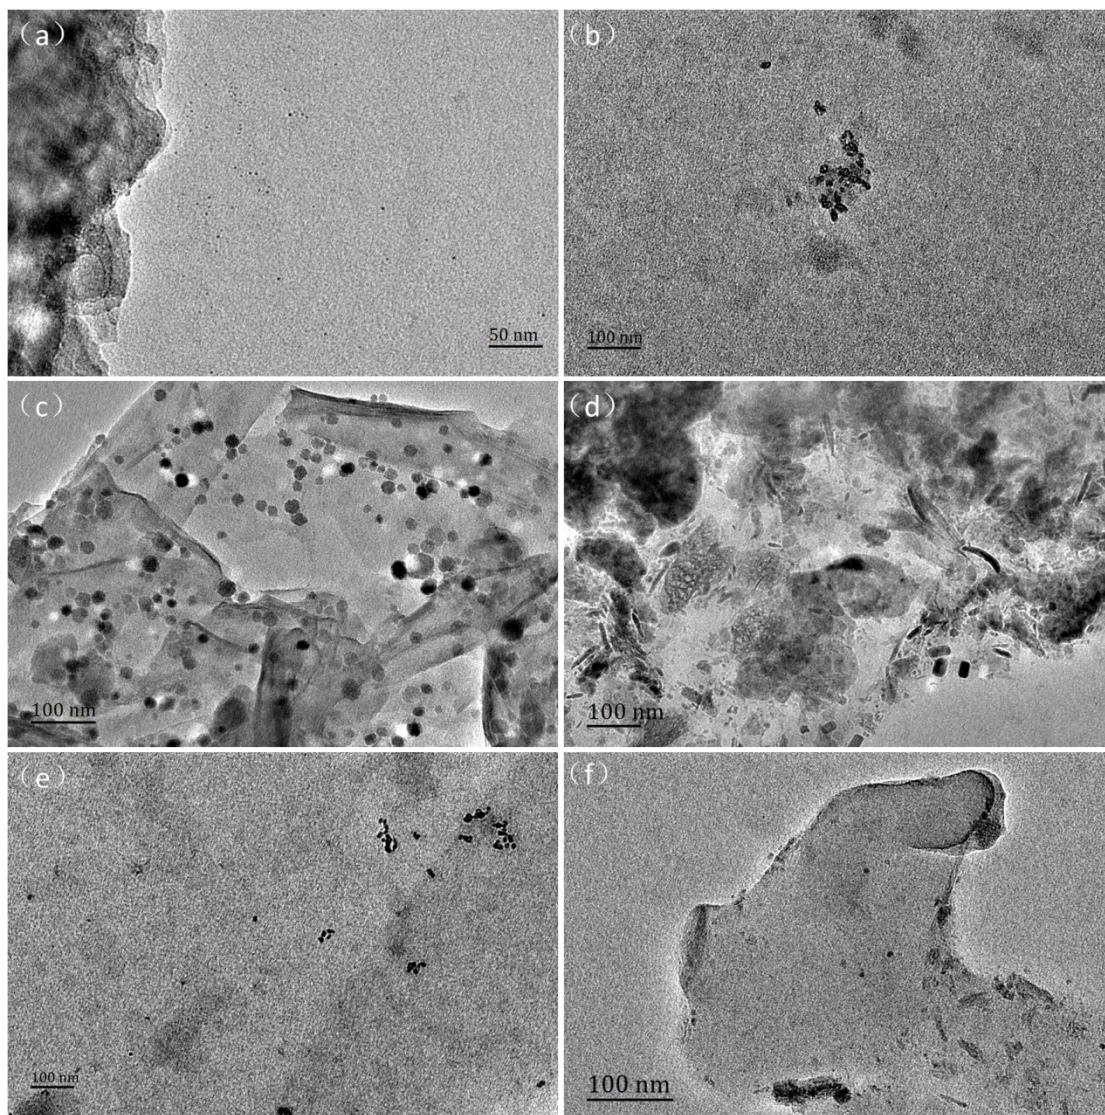

Fig. S6 TEM images of M-NG doped with different metal ions (a)  $\text{Ag}^+$ , (b)  $\text{Ni}^{2+}$ , (c)  $\text{Fe}^{2+}$ , (d)  $\text{Co}^{2+}$ , (e)  $\text{Mg}^{2+}$ , (f)  $\text{Zn}^{2+}$ .

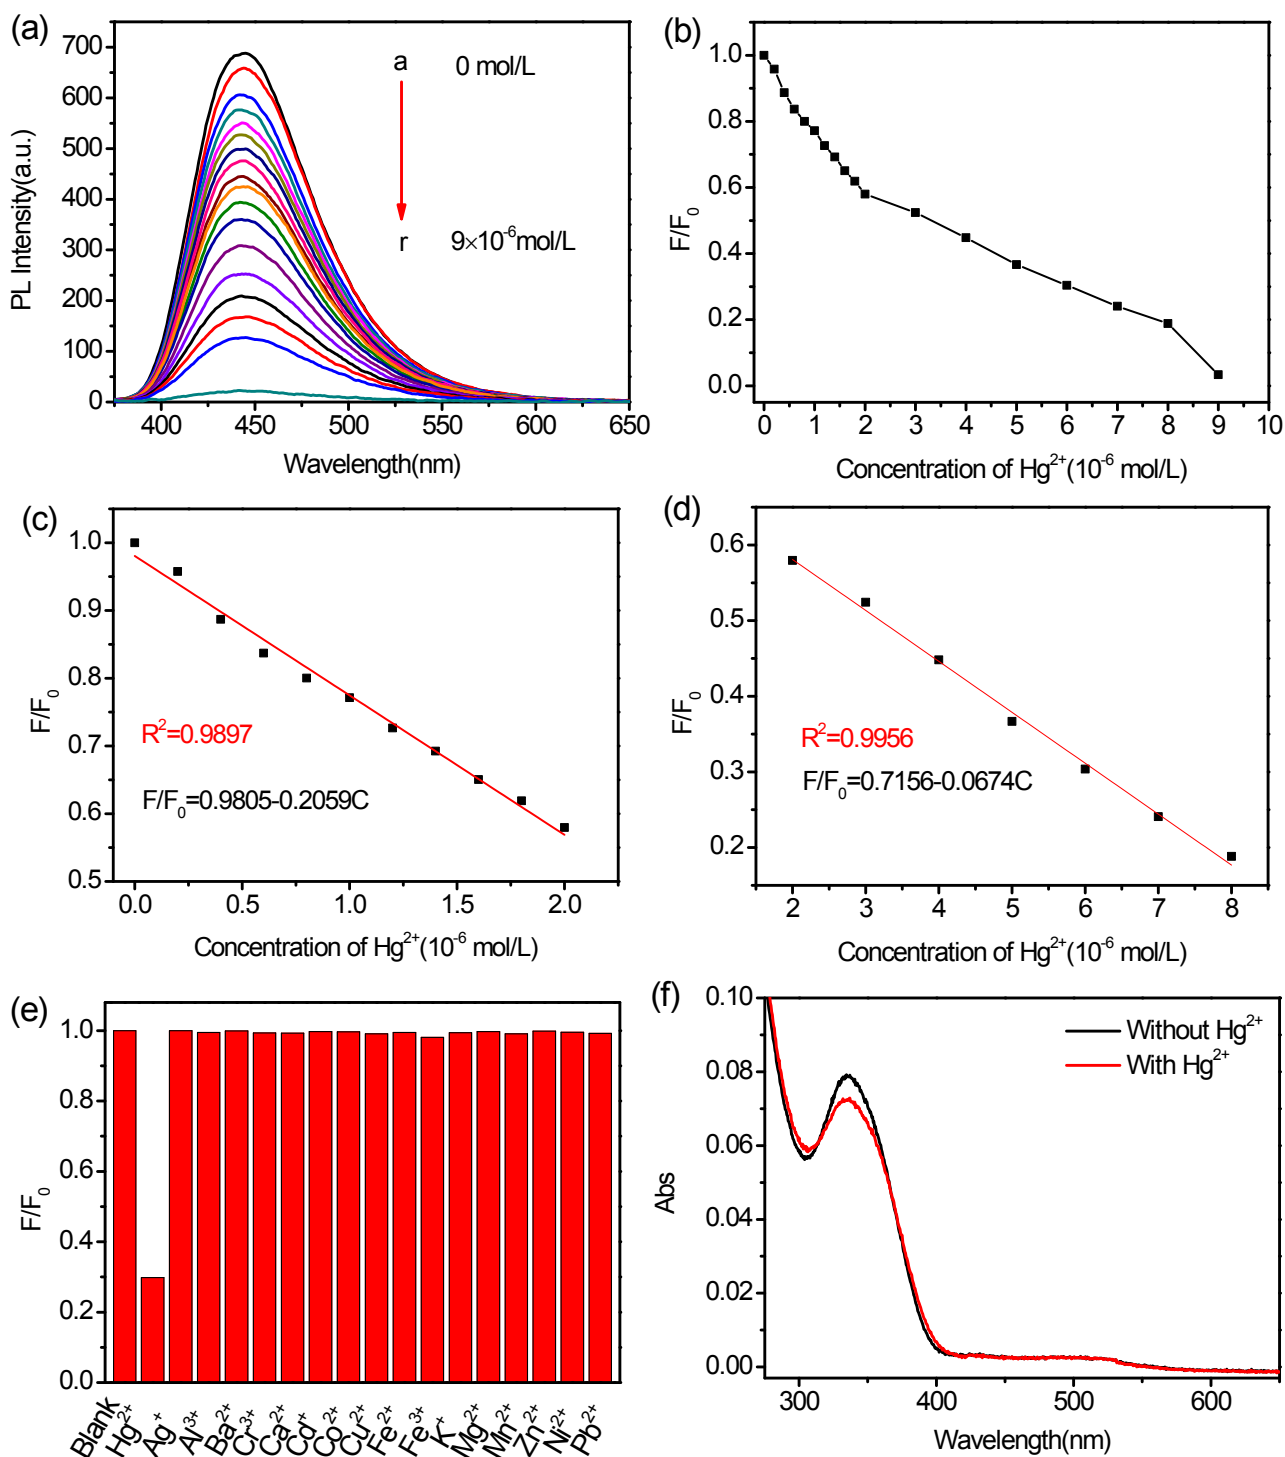

Fig. S7 (a) Emission spectra ( $\lambda_{\text{ex}} = 370 \text{ nm}$ ) of Mn(II)-NGQDs in the presence of different concentrations of Hg<sup>2+</sup> (from 0 to 9 × 10<sup>-6</sup> mol/L) in Milli-Q water. a: 0 × 10<sup>-6</sup> mol/L, b: 0.2 × 10<sup>-6</sup> mol/L, c: 0.4 × 10<sup>-6</sup> mol/L, d: 0.6 × 10<sup>-6</sup> mol/L, e: 0.8 × 10<sup>-6</sup> mol/L, f: 1.0 × 10<sup>-6</sup> mol/L, g: 1.2 × 10<sup>-6</sup> mol/L, h: 1.4 × 10<sup>-6</sup> mol/L, i: 1.6 × 10<sup>-6</sup> mol/L, j: 1.8 × 10<sup>-6</sup>

mol/L, k:  $2.0 \times 10^{-6}$  mol/L, l:  $3.0 \times 10^{-6}$  mol/L, m:  $4.0 \times 10^{-6}$  mol/L, n:  $5.0 \times 10^{-6}$  mol/L, o:  $6.0 \times 10^{-6}$  mol/L, p:  $7.0 \times 10^{-6}$  mol/L, q:  $8.0 \times 10^{-6}$  mol/L, r:  $9.0 \times 10^{-6}$  mol/L; (b) The relationship between the  $F/F_0$  and  $Hg^{2+}$  concentrations (c:  $0-9.0 \times 10^{-6}$  mol/L); (c) Plots of intensity ratio of  $F/F_0$  versus the concentrations of  $Hg^{2+}$  ( $0-2.0 \times 10^{-6}$  mol/L); (d) Plots of intensity ratio of  $F/F_0$  versus the concentrations of  $Hg^{2+}$  ( $2.0 \times 10^{-6}-8.0 \times 10^{-6}$  mol/L); (e) Fluorescence responses of Mn(II)-NGQDs to the different metal ions in Milli-Q water. The concentration of each metal ion is  $6.0 \times 10^{-6}$  mol/L.  $F_0$  and  $F$  correspond to the fluorescence intensities of Mn(II)-NGQDs at 440 nm with the 370 nm excitation wavelength in the absence and presence of metal ions, respectively; (f) The UV absorption spectra of Mn(II)-NGQDs without  $Hg^{2+}$  and in the presence of  $Hg^{2+}$  ( $6.0 \times 10^{-6}$  mol/L).

The linear relationship of  $F/F_0$  versus  $Hg^{2+}$  ions concentration is in the range of 0 mol/L to  $2.0 \times 10^{-6}$  mol/L ( Fig. S7c,) and  $2.0 \times 10^{-6}$  mol/L to  $8.0 \times 10^{-6}$  mol/L (Fig. S7d), and the detection limit of  $3.2 \times 10^{-7}$  mol/L.

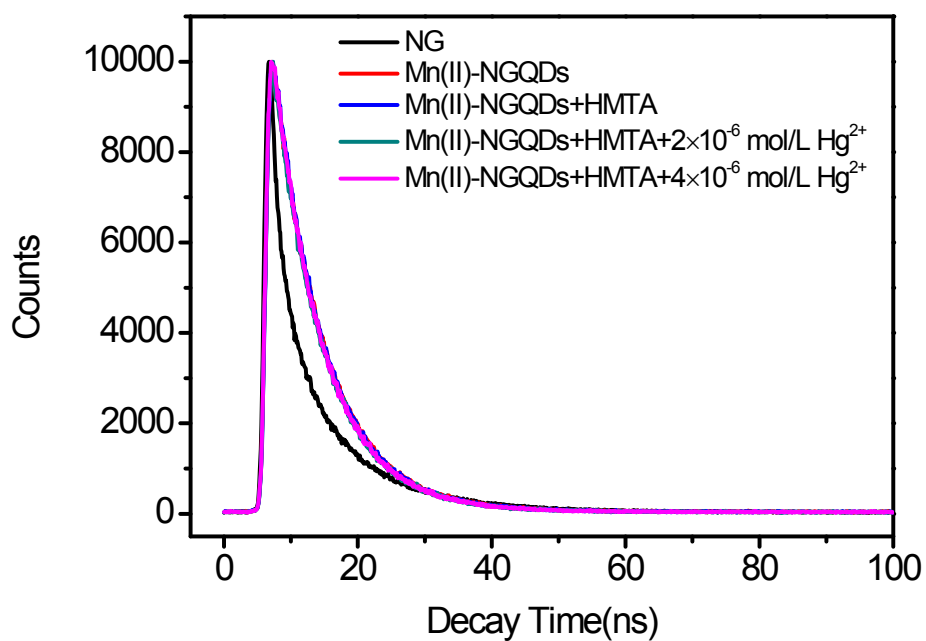

Fig. S8 Fluorescence decay curves of Mn(II)-NGQDs in the presence of different concentration of  $Hg^{2+}$  in HMTA buffer solution (pH=7.35) with emission monitored at 440nm and excitation at 369.6 nm.

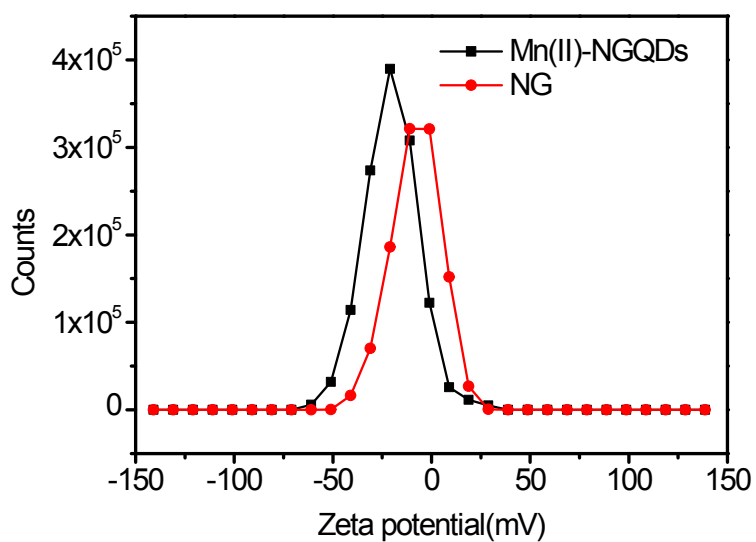

Fig. S9 Zeta potential of Mn(II)-NGQDs and NG

## References

- [S1] J. Liao, Z. Cheng and L. Zhou, *ACS Sustain. Chem. & Eng.*, 2016, **4**, 3053-3061.
- [S2] S. Y. Choi, S. H. Baek, S. J. Chang, Y. Song, R. Rafique, K. T. Lee and T. J. Park, *Biosens. Bioelectron.*, 2017, **93**, 267-273.
- [S3] Y. Zhang, P. Cui, F. Zhang, X. Feng, Y. Wang, Y. Yang and X. Liu, *Talanta*, 2016, **152**, 288-300.
